# Supplementary material for: Sleep disordered breathing in Marfan syndrome: Value of standard screening questionnaires
Source: PubMed Central journal article supplement — Mol Genet Genomic Med. 2019 Nov 10;8(1):e1039. doi: 10.1002/mgg3.1039 (PMC6978263; doi:10.1002/mgg3.1039), 2019-11-10
Supplement: MGG3-8-e1039-s001.pdf [file MGG3-8-e1039-s001.pdf]

## Supplements

### **STOP-BANG Sleep Apnea Questionnaire**

*Chung F et al Anesthesiology 2008 and BJA 2012*

| <b>STOP</b>                                                                                       |     |    |
|---------------------------------------------------------------------------------------------------|-----|----|
| Do you <b>SNORE</b> loudly (louder than talking or loud enough to be heard through closed doors)? | Yes | No |
| Do you often feel <b>TIRED</b> , fatigued, or sleepy during daytime?                              | Yes | No |
| Has anyone <b>OBSERVED</b> you stop breathing during your sleep?                                  | Yes | No |
| Do you have or are you being treated for high blood <b>PRESSURE</b> ?                             | Yes | No |

  

| <b>BANG</b>                                   |     |    |
|-----------------------------------------------|-----|----|
| <b>BMI</b> more than 35kg/m <sup>2</sup> ?    | Yes | No |
| <b>AGE</b> over 50 years old?                 | Yes | No |
| <b>NECK</b> circumference > 16 inches (40cm)? | Yes | No |
| <b>GENDER</b> : Male?                         | Yes | No |

  

| <b>TOTAL SCORE</b> |  |  |
|--------------------|--|--|
|--------------------|--|--|

**High risk of OSA: Yes 5 - 8**

**Intermediate risk of OSA: Yes 3 - 4**

**Low risk of OSA: Yes 0 - 2**

## Sleep Apnea Clinical Score

### Preoperative Questionnaire / Sleep Evaluation

Patient Name: \_\_\_\_\_

Date: \_\_\_\_\_

PATIENT: PLEASE ANSWER

- |                                                                                                                                                                                                                                                                                                                                                                                                                                                                                                                                                                                                                                                                                                                                                                                                                                                                                                         |                                                                                                                                                                                                                                                                                                                                                                                                                                                                                                                                                                                                                                                                                                                                                                                                                       |
|---------------------------------------------------------------------------------------------------------------------------------------------------------------------------------------------------------------------------------------------------------------------------------------------------------------------------------------------------------------------------------------------------------------------------------------------------------------------------------------------------------------------------------------------------------------------------------------------------------------------------------------------------------------------------------------------------------------------------------------------------------------------------------------------------------------------------------------------------------------------------------------------------------|-----------------------------------------------------------------------------------------------------------------------------------------------------------------------------------------------------------------------------------------------------------------------------------------------------------------------------------------------------------------------------------------------------------------------------------------------------------------------------------------------------------------------------------------------------------------------------------------------------------------------------------------------------------------------------------------------------------------------------------------------------------------------------------------------------------------------|
| <p>1. Have you ever been diagnosed with sleep apnea or use CPAP?<br/> <input type="checkbox"/> Yes <input type="checkbox"/> No<br/>                 If yes, are you using CPAP generally every night for more than 4 hours per night?<br/> <input type="checkbox"/> Yes <input type="checkbox"/> No</p> <p>3. People who have shared (or are sharing) my bedroom tell me that I snore. Please pick the best response for the frequency of snoring:<br/> <input type="checkbox"/> I don't know<br/> <input type="checkbox"/> Never<br/> <input type="checkbox"/> Rarely (1-2 times per year)<br/> <input type="checkbox"/> Occasionally (4-8 times per year)<br/> <input type="checkbox"/> Sometimes (1-2 times per month)<br/> <input type="checkbox"/> Often (1-2 times per week)*<br/> <input type="checkbox"/> Usually (3-5 times per week)*<br/> <input type="checkbox"/> Always (every night)*</p> | <p>2. Do you have high blood pressure or have you been told to take medication for high blood pressure?<br/> <input type="checkbox"/> Yes<br/> <input type="checkbox"/> No</p> <p>4. I have been told by other people that I gasp, choke, snort or stop breathing while I am sleeping. Please pick the best response for the frequency of any of these symptoms:<br/> <input type="checkbox"/> I don't know<br/> <input type="checkbox"/> Never<br/> <input type="checkbox"/> Rarely (1-2 times per year)<br/> <input type="checkbox"/> Occasionally (4-8 times per year)<br/> <input type="checkbox"/> Sometimes (1-2 times per month)<br/> <input type="checkbox"/> Often (1-2 times per week)*<br/> <input type="checkbox"/> Usually (3-5 times per week)*<br/> <input type="checkbox"/> Always (every night)*</p> |
|---------------------------------------------------------------------------------------------------------------------------------------------------------------------------------------------------------------------------------------------------------------------------------------------------------------------------------------------------------------------------------------------------------------------------------------------------------------------------------------------------------------------------------------------------------------------------------------------------------------------------------------------------------------------------------------------------------------------------------------------------------------------------------------------------------------------------------------------------------------------------------------------------------|-----------------------------------------------------------------------------------------------------------------------------------------------------------------------------------------------------------------------------------------------------------------------------------------------------------------------------------------------------------------------------------------------------------------------------------------------------------------------------------------------------------------------------------------------------------------------------------------------------------------------------------------------------------------------------------------------------------------------------------------------------------------------------------------------------------------------|

Neck Measurement: \_\_\_\_\_ cm

Total Number of Historical Features: \_\_\_\_\_

NURSING STAFF ONLY

| <i>(Circle the patient's score)</i> Prediction of OSA - Sleep Apnea Clinical Score |                         |     |      |                      |     |      |
|------------------------------------------------------------------------------------|-------------------------|-----|------|----------------------|-----|------|
| Neck Circ (CM)                                                                     | <i>Not Hypertensive</i> |     |      | <i>Hypertensive</i>  |     |      |
|                                                                                    | Historical Features*    |     |      | Historical Features* |     |      |
|                                                                                    | None                    | One | Both | None                 | One | Both |
| <30                                                                                | 0                       | 0   | 1    | 0                    | 1   | 2    |
| 30-31                                                                              | 0                       | 0   | 1    | 1                    | 2   | 4    |
| 32-33                                                                              | 0                       | 1   | 2    | 1                    | 3   | 5    |
| 34-35                                                                              | 1                       | 2   | 3    | 2                    | 4   | 8    |
| 36-37                                                                              | 1                       | 3   | 5    | 4                    | 6   | 11   |
| 38-39                                                                              | 2                       | 4   | 7    | 5                    | 9   | 16   |
| 40-41                                                                              | 3                       | 6   | 10   | 8                    | 13  | 22   |
| 42-43                                                                              | 5                       | 8   | 14   | 11                   | 18  | 30   |
| 44-45                                                                              | 7                       | 12  | 20   | 15                   | 25  | 42   |
| 46-47                                                                              | 10                      | 16  | 28   | 21                   | 35  | 58   |
| 48-49                                                                              | 14                      | 23  | 38   | 29                   | 48  | 80   |
| >49                                                                                | 19                      | 32  | 53   | 40                   | 66  | 110  |

\*Historical Features: 1. Habitual snoring 2. Partner reports of gasping, choking or snorting

|                                                                                                                                                                                                                                                                    |                                                                                                                                                                                                                                                                                                                                     |
|--------------------------------------------------------------------------------------------------------------------------------------------------------------------------------------------------------------------------------------------------------------------|-------------------------------------------------------------------------------------------------------------------------------------------------------------------------------------------------------------------------------------------------------------------------------------------------------------------------------------|
| <p><b>Probability of sleep apnea</b></p> <p><input type="checkbox"/> Low – Sleep Apnea Clinical Score &lt;8</p> <p><input type="checkbox"/> Borderline – Sleep Apnea Clinical Score 8-14</p> <p><input type="checkbox"/> High – Sleep Apnea Clinical Score ≥15</p> | <p><input type="checkbox"/> Patient may be a difficult intubation (micrognathic mandible, large tongue base, narrow oropharyngeal inlet, enlarged tonsils).</p> <p><b>Note:</b> If checked, consider a PSG evaluation, especially if patient reports excessive daytime sleepiness in spite of a low Sleep Apnea Clinical Score.</p> |
|--------------------------------------------------------------------------------------------------------------------------------------------------------------------------------------------------------------------------------------------------------------------|-------------------------------------------------------------------------------------------------------------------------------------------------------------------------------------------------------------------------------------------------------------------------------------------------------------------------------------|

**Berlin Questionnaire®**  
**Sleep Apnea**

Height (m) \_\_\_\_\_ Weight (kg) \_\_\_\_\_ Age \_\_\_\_\_ Male / Female

Please choose the correct response to each question.

**Category 1**

- 1. Do you snore?**  
 a. Yes  
 b. No  
 c. Don't know

*If you answered 'yes':*

- 2. Your snoring is:**  
 a. Slightly louder than breathing  
 b. As loud as talking  
 c. Louder than talking

- 3. How often do you snore?**  
 a. Almost every day  
 b. 3-4 times per week  
 c. 1-2 times per week  
 d. 1-2 times per month  
 e. Rarely or never

- 4. Has your snoring ever bothered other people?**  
 a. Yes  
 b. No  
 c. Don't know

- 5. Has anyone noticed that you stop breathing during your sleep?**  
 a. Almost every day  
 b. 3-4 times per week  
 c. 1-2 times per week  
 d. 1-2 times per month  
 e. Rarely or never

**Category 2**

- 6. How often do you feel tired or fatigued after your sleep?**  
 a. Almost every day  
 b. 3-4 times per week  
 c. 1-2 times per week  
 d. 1-2 times per month  
 e. Rarely or never

- 7. During your waking time, do you feel tired, fatigued or not up to par?**  
 a. Almost every day  
 b. 3-4 times per week  
 c. 1-2 times per week  
 d. 1-2 times per month  
 e. Rarely or never

- 8. Have you ever nodded off or fallen asleep while driving a vehicle?**  
 a. Yes  
 b. No

*If you answered 'yes':*

- 9. How often does this occur?**  
 a. Almost every day  
 b. 3-4 times per week  
 c. 1-2 times per week  
 d. 1-2 times per month  
 e. Rarely or never

**Category 3**

- 10. Do you have high blood pressure?**  
 Yes  
 No  
 Don't know

**Scoring Berlin Questionnaire**

The questionnaire consists of 3 categories related to the risk of having sleep apnea. Patients can be classified into High Risk or Low Risk based on their responses to the individual items and their overall scores in the symptom categories.

**Categories and Scoring:**

**Category 1:** items 1, 2, 3, 4, and 5;

Item 1: if 'Yes', assign 1 point

Item 2: if 'c' or 'd' is the response, assign 1 point

Item 3: if 'a' or 'b' is the response, assign 1 point

Item 4: if 'a' is the response, assign 1 point

Item 5: if 'a' or 'b' is the response, assign 2 points

**Add points.** Category 1 is positive if the total score is 2 or more points.

**Category 2:** items 6, 7, 8 (item 9 should be noted separately).

Item 6: if 'a' or 'b' is the response, assign 1 point

Item 7: if 'a' or 'b' is the response, assign 1 point

Item 8: if 'a' is the response, assign 1 point

**Add points.** Category 2 is positive if the total score is 2 or more points.

**Category 3** is positive if the answer to item 10 is 'Yes' or if the BMI of the patient is greater than 30kg/m<sup>2</sup>.

(BMI is defined as weight (kg) divided by height (m) squared, i.e., kg/m<sup>2</sup>).

**High Risk:** if there are 2 or more categories where the score is positive.

**Low Risk:** if there is only 1 or no categories where the score is positive.

**Additional Question:** item 9 should be noted separately.
